# Supplementary material for: A deep-learning technique for phase identification in multiphase inorganic compounds using synthetic XRD powder patterns
Source: PubMed Central journal article supplement (PMC6941984; doi:10.1038/s41467-019-13749-3), 2020-01-03
Supplement: 41467_2019_13749_MOESM1_ESM.pdf [file 41467_2019_13749_MOESM1_ESM.pdf]

# Supplementary Information

**A deep-learning technique for phase identification in multiphase inorganic compounds using synthetic XRD powder patterns**

**Lee et al.**

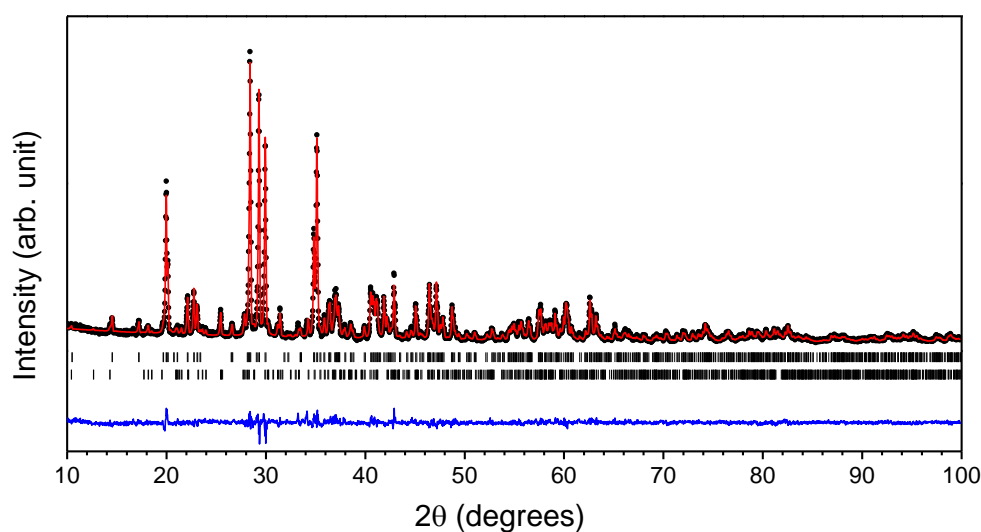

Lattice parameters and the agreement factors obtained after the Two-Phase-Rietveld refinement for  $\text{SrAl}_2\text{O}_4$  and  $\text{Sr}_4\text{Al}_{14}\text{O}_{25}$ .

---

**$\text{SrAl}_2\text{O}_4$  Phase:**

---

Space group:  $P2_1$

Number of formula per unit cell (Z): 2

Lattice parameters:  $a = 8.4439(3)$ ,  $b = 8.8208(3)$ ,  $c = 5.1591(2)$  Å,  $\alpha = \gamma = 90^\circ$ ,  $\beta = 93.409(2)^\circ$

Phase fraction: 85%

---

**$\text{Sr}_4\text{Al}_{14}\text{O}_{25}$  Phase:**

---

Space group:  $Pmma$

Number of formula per unit cell (Z): 2

Lattice parameters:  $a = 24.784(2)$ ,  $b = 8.4808(8)$ ,  $c = 4.862(6)$  Å,  $\alpha = \beta = \gamma = 90^\circ$

Phase fraction: 15%

---

Agreement factors:  $R_p = 14.0$ ,  $R_{wp} = 14.8$ ,  $R_{exp} = 11.17$ ,  $\chi^2 = 1.76$

---

**Supplementary Figure 1** A full pattern fit obtained after using two phase Rietveld refinement on powder x-ray diffraction data in the  $2\theta$  range  $10\text{-}100^\circ$  with monoclinic structure in the  $P2_1$  space group for  $\text{SrAl}_2\text{O}_4$  phase and orthorhombic structure in the  $Pmma$  space group for  $\text{Sr}_4\text{Al}_{14}\text{O}_{25}$  phase. Black dots, red line and blue line represents the experimental, calculated and difference profiles, respectively. The vertical tick marks above the difference profile in first and second row from top denotes the position of Bragg reflections for  $\text{SrAl}_2\text{O}_4$  and  $\text{Sr}_4\text{Al}_{14}\text{O}_{25}$  phases, respectively.

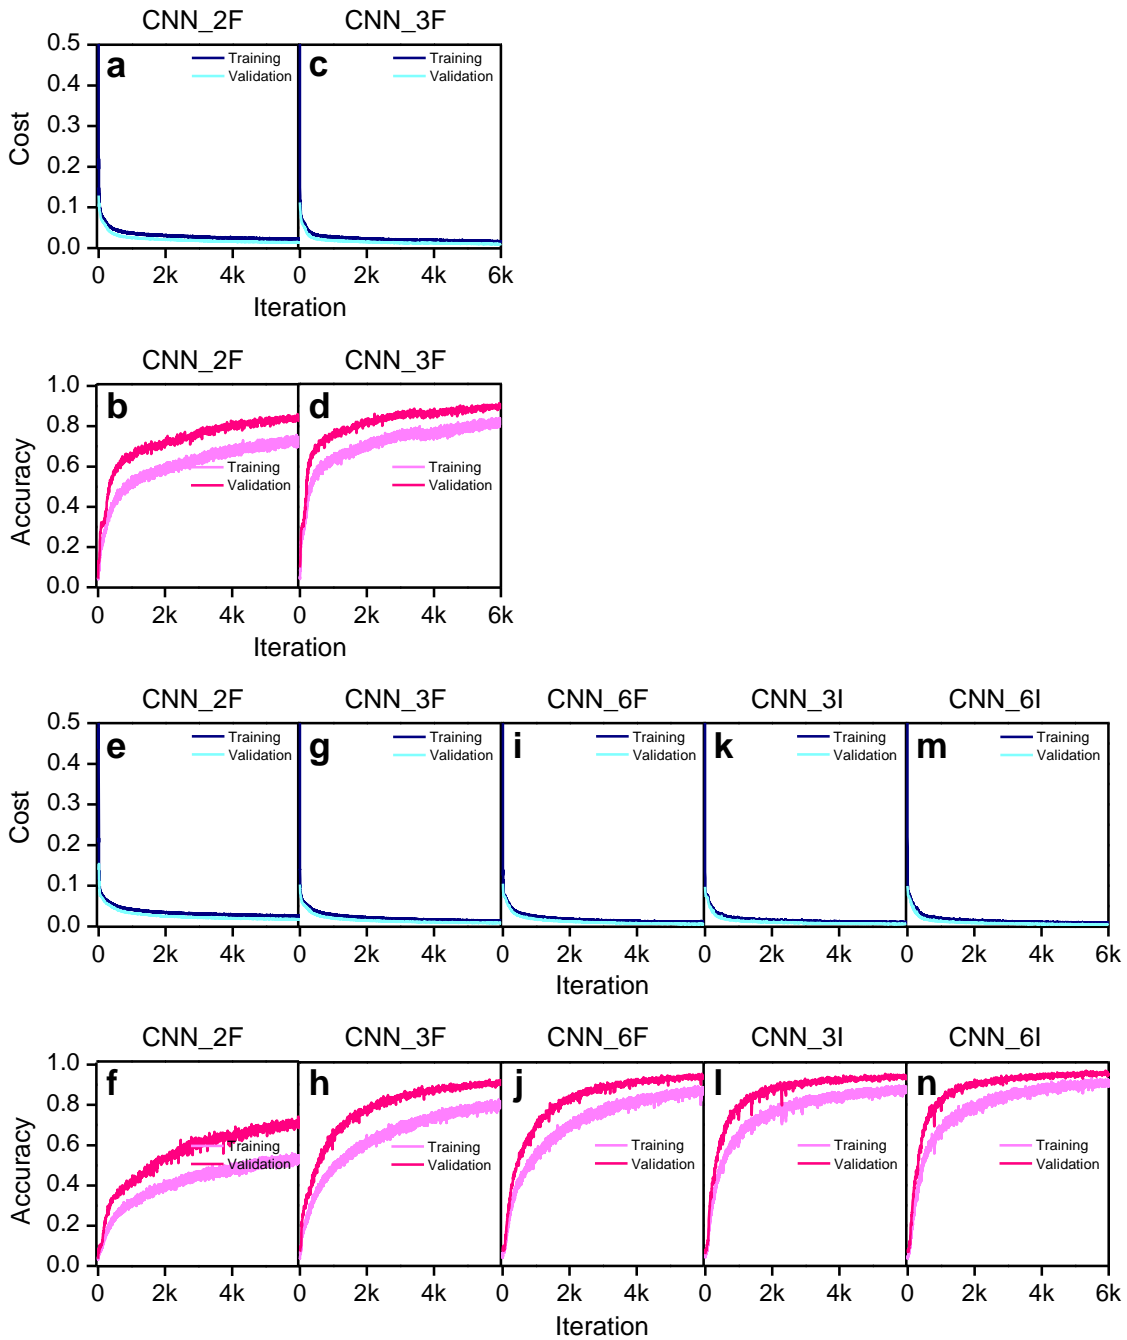

**Supplementary Figure 2** The training loss/accuracy and the validation loss/accuracy for the four- and five-level-phase-fraction predictions plotted as a function of the iteration number up to the 10<sup>th</sup> epoch. The four-level-phase-fraction predictions are plotted only for CNN\_2F (**a** and **b**) and CNN\_3F (**c** and **d**) architectures. Additional five-level-phase-fraction predictions based on CNN\_2F (**e** and **f**) and CNN\_3F (**g** and **h**) CNN\_6F (**i** and **j**), CNN\_3I (**k** and **l**) and CNN\_6I (**m** and **n**) are also given.

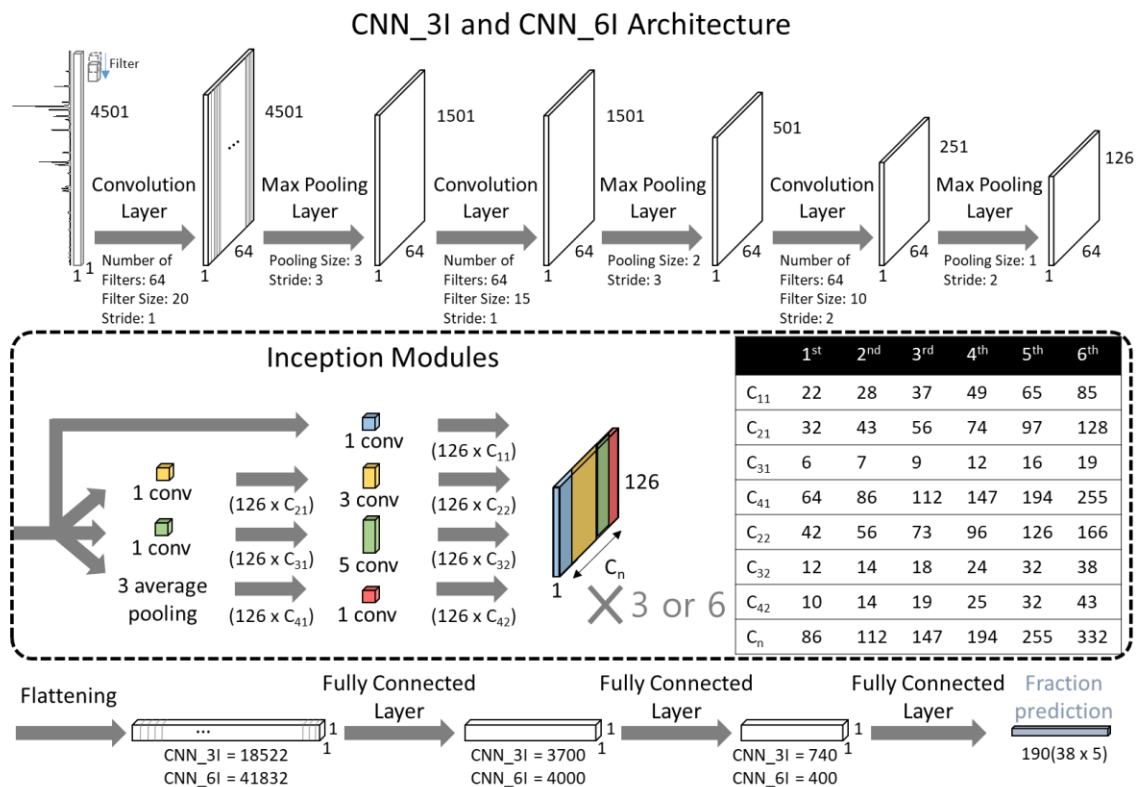

**Supplementary Figure 3** The inception net used for the five-level-phase-fraction prediction (CNN<sub>3I</sub>, and CNN<sub>6I</sub>). Typical 1D convolutional layers adopted CNN<sub>3</sub> and 3F (top row), the inception module along with the number of kernels listed in the table on the right side (middle row,) and the typical fully connected layers (bottom row). Three or six inception modules that are actually attached in sequence in the middle row were omitted but can be simply represented as 'x 3' or 'x 6'.

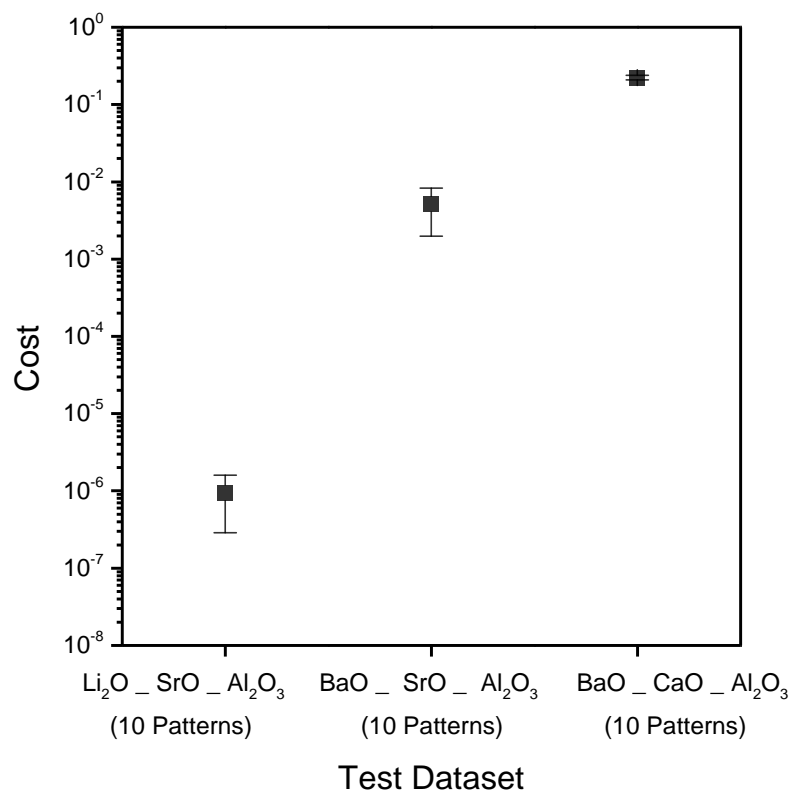

**Supplementary Figure 4** The minimum cost (loss) function values for two test datasets (BaO-SrO-Al<sub>2</sub>O<sub>3</sub> and BaO-CaO-Al<sub>2</sub>O<sub>3</sub>) wherein the two outsiders were included in the mixture in comparison with the correctly matched dataset (Li<sub>2</sub>O-SrO-Al<sub>2</sub>O<sub>3</sub>). The square dots and whiskers indicate the mean and standard deviation.

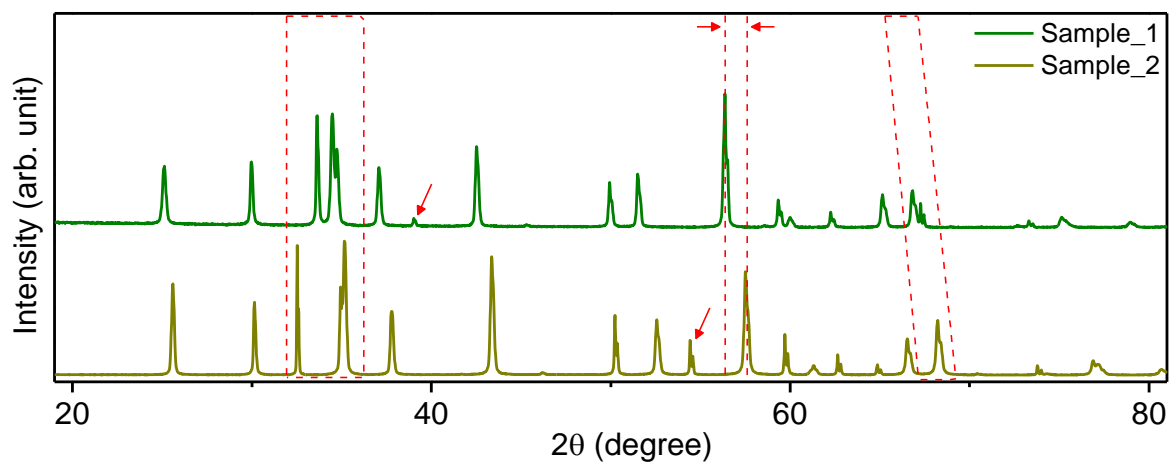

**Supplementary Figure 5** Two synthetic patterns, both of which represent  $\text{Li}_2\text{O-SrO-Al}_2\text{O}_3$  with a fraction of 0.38-0.24-0.38, and thereby our CNN model correctly identified these two patterns as a  $\text{Li}_2\text{O-SrO-Al}_2\text{O}_3$  mixture. Both the sample shared exactly the same constituent and the same fraction. However, they look completely different. It is clearly observed that almost every peak position was conspicuously shifted due to the choice of different variants, and the peak profile for all peaks are also different due to the random choice of  $u$ ,  $v$ ,  $w$ ,  $x$ , and  $\eta$  values. The conspicuous difference is marked by dashed lines and arrows.

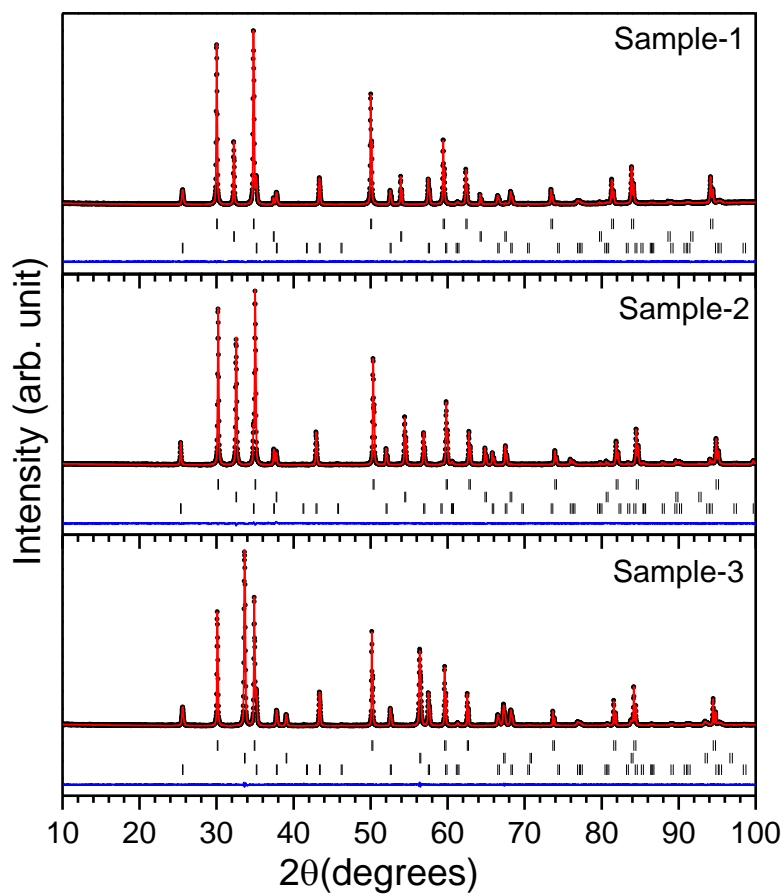

Height and weight fraction (%) of Li<sub>2</sub>O, SrO and Al<sub>2</sub>O<sub>3</sub> in three different samples

| Sample No. | Li <sub>2</sub> O |              | SrO             |              | Al <sub>2</sub> O <sub>3</sub> |              |
|------------|-------------------|--------------|-----------------|--------------|--------------------------------|--------------|
|            | Height fraction   | Wt. fraction | Height fraction | Wt. fraction | Height fraction                | Wt. fraction |
| Sample-1   | 38%               | 9.42%        | 52%             | 67.46%       | 10%                            | 23.11 %      |
| Sample-2   | 52%               | 20.27%       | 38%             | 58.50%       | 10%                            | 21.23 %      |
| Sample-3   | 66%               | 33.79%       | 24%             | 40.05%       | 10%                            | 26.16 %      |

**Supplementary Figure 6** Rietveld refinement fit for three different samples containing a mixture of SrO ( $Fm\bar{3}m$ ), Li<sub>2</sub>O ( $Fm\bar{3}m$ ) and Al<sub>2</sub>O<sub>3</sub> ( $R\bar{3}c$ ) in different proportions. Black dots, red line, blue line in the figure represents the simulated, calculated and difference profiles, respectively. The vertical tick marks above the difference profile in the first, second and third lines from the top represents the Bragg's position for SrO, Li<sub>2</sub>O and Al<sub>2</sub>O<sub>3</sub>, respectively.

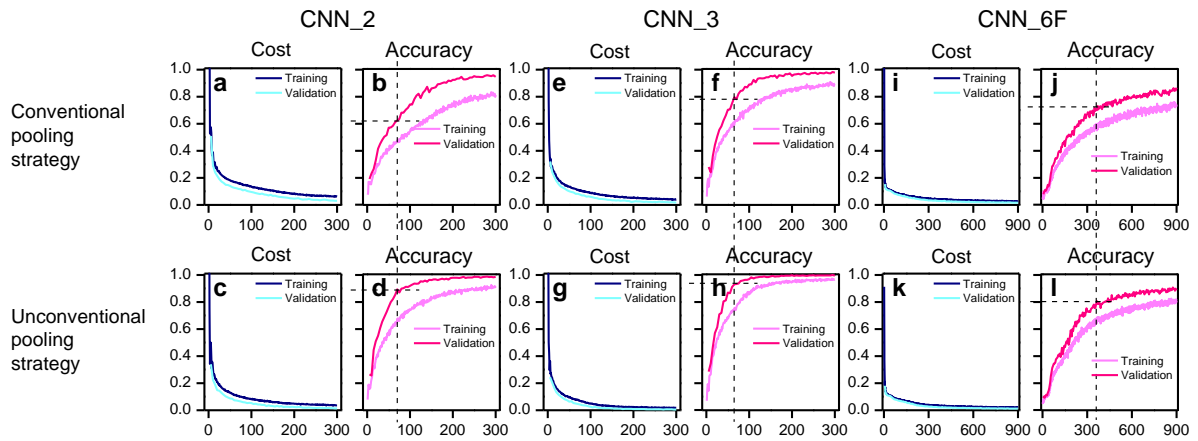

**Supplementary Figure 7** The training loss/accuracy and the validation loss/accuracy at the early stage of training for the conventional and unconventional pooling strategies in the phase identification based on CNN\_2 (**a**, **b**, **c**, and **d**) and CNN\_3 (**e**, **f**, **g**, and **h**), and the three-level-phase-fraction prediction based on CNN\_6F (**i**, **j**, **k**, and **l**). The intersect on the vertical dashed line clearly indicates the faster training for the unconventional pooling strategy. The conventional pooling (& stride) strategy stands for a stride that is greater than the pooling size and the unconventional strategy for the stride is equal to the pooling size.



### CNN\_4F Architecture

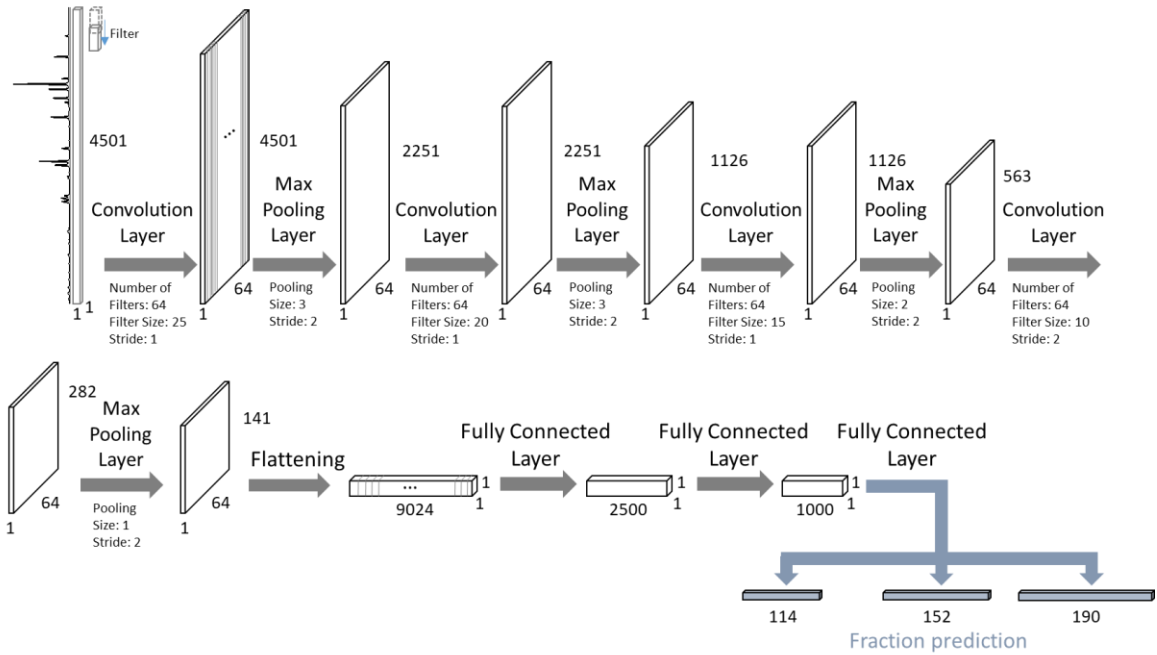

### CNN\_5F Architecture

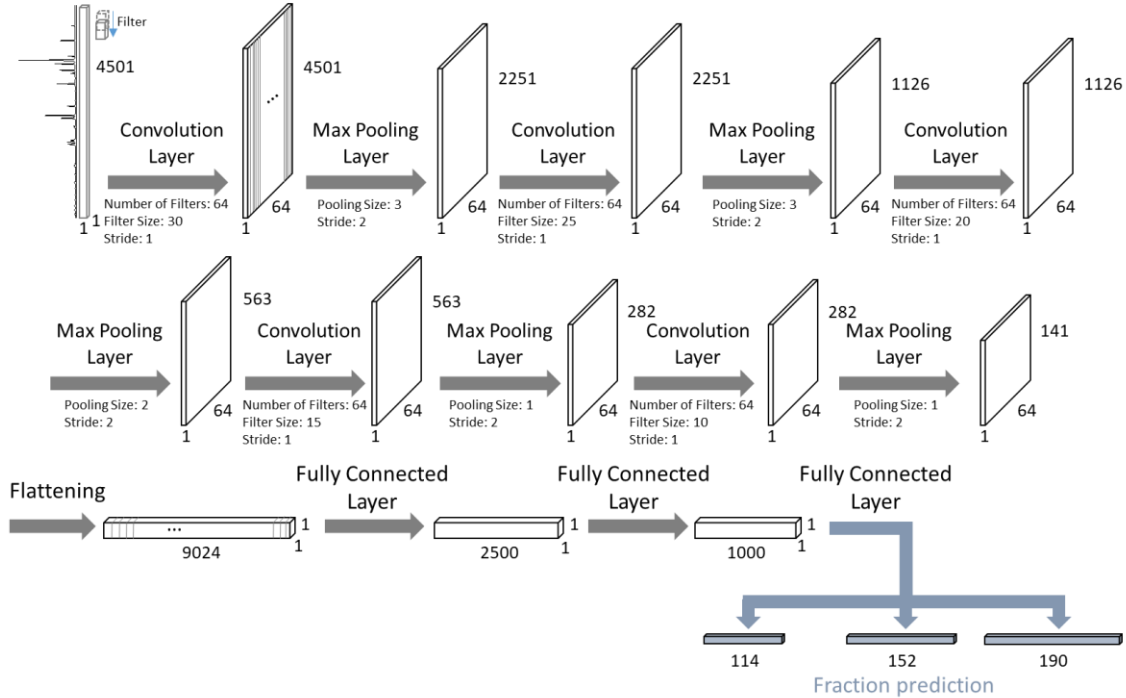

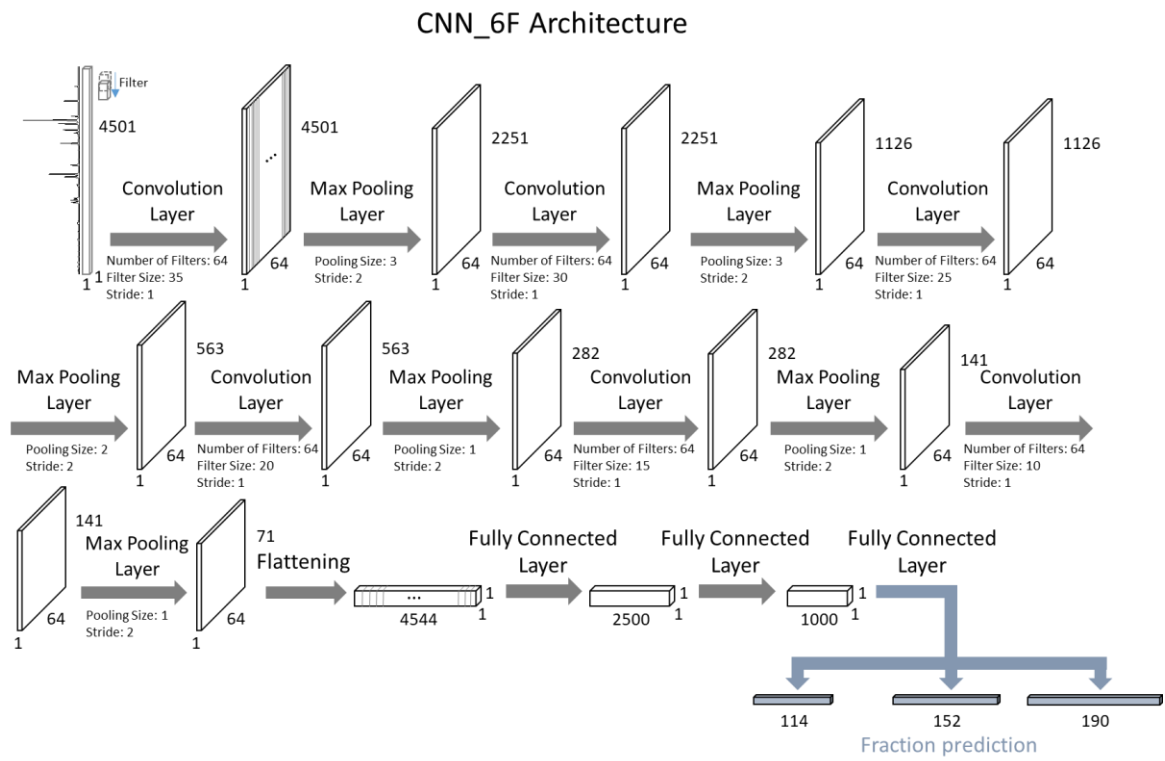

**Supplementary Figure 8** The schematic representation for CNN\_4F, 5F, and 6F architectures.

#### Four- and Five-Step-Phase-Fraction Prediction Test Result

|                   |                    | CNN_2F | CNN_3F | CNN_6F | CNN_3I | CNN_6I |
|-------------------|--------------------|--------|--------|--------|--------|--------|
| 4_level_fraction_ | Simulated XRD test |        |        |        |        |        |
| prediction        | dataset            |        |        |        |        |        |
| (10 Epochs)       | 100,000 patterns   | 87.29% | 91.43% | —      | —      | —      |
| 5_level_fraction_ | Simulated XRD test |        |        |        |        |        |
| prediction        | dataset            |        |        |        |        |        |
| (10 Epochs)       | 100,000 patterns   | 77.65% | 92.44% | 94.76% | 94.28% | 95.90% |

**Supplementary Table 1** The test results from the four- and five-level-phase-fraction predictions for the simulated test datasets.

## Baseline Method Result

---

KNN Test Accuracy: (Dataset\_180k\_rand)

---

35.72% (k=3, Euclidean), 32.39% (k=5, Euclidean), 29.84% (k=13, Euclidean), 25.57% (k=51, Euclidean)

---

SVM Test Accuracy: (Dataset\_180k\_rand)

---

45.76% (radial basis function kernel)

---

RF Test Accuracy: (Dataset\_180k\_rand)

---

69.37% (# of trees=5), 78.47% (# of trees=10), 81.48% (# of trees=15), 86.34% (# of trees=50), 87.63% (# of trees=100)

---

RF Real Data Test Accuracy: (The real test dataset for  $\text{Li}_2\text{O-SrO-Al}_2\text{O}_3$  ternary mixtures)

---

20% (# of trees=5), 28% (# of trees=10), 34% (# of trees=15), 42% (# of trees=50), 58% (# of trees=100)

---

---

KNN Test Accuracy: (MNIST dataset)

---

97.05% (k=3, Euclidean), 96.88% (k=5, Euclidean), 96.53% (k=13, Euclidean), 95.33% (k=51, Euclidean)

---

**Supplementary Table 2** The KNN, SVM and RF test results from the phase identification. Some important hyper-parameters are presented in the parenthesis along with the test accuracy. The real data test accuracies for RF are only presented but those for the others are omitted since they are too low. The KNN results for the MNIST data classification are presented on the bottom. The hyper-parameters used for the Dataset\_180k\_rand are identical to those for the MNIST data.

**Supplementary Table 3** The list of 170 constituent compounds. The structure type and the number of duplicates for each of 38 classes are also given.

| 38 Classes                                                        | ICSD_N<br>um                   | Compound                       | Space<br>Group | Lattice Parameter |                  |                     |          |         |          |
|-------------------------------------------------------------------|--------------------------------|--------------------------------|----------------|-------------------|------------------|---------------------|----------|---------|----------|
|                                                                   |                                |                                |                | a                 | b                | c                   | $\alpha$ | $\beta$ | $\gamma$ |
| Corundum-<br>Al <sub>2</sub> O <sub>3</sub> (Al-O)<br>Class_Num_0 | 10425                          | Al <sub>2</sub> O <sub>3</sub> | R-3cH (167)    | 4.754(1)          | 4.754(1)         | 12.99(2)            | 90       | 90      | 120      |
|                                                                   | 10426                          | Al <sub>2</sub> O <sub>3</sub> | R-3cH (167)    | 4.844(2)          | 4.844(2)         | 13.27(2)            | 90       | 90      | 120      |
|                                                                   | 160604                         | Al <sub>2</sub> O <sub>3</sub> | R-3cH (167)    | 4.7617(1)         | 4.7617(1)        | 12.9990(2)          | 90       | 90      | 120      |
|                                                                   | 160605                         | Al <sub>2</sub> O <sub>3</sub> | R-3cH (167)    | 4.7698(1)         | 4.7698(1)        | 13.0243(4)          | 90       | 90      | 120      |
|                                                                   | 160606                         | Al <sub>2</sub> O <sub>3</sub> | R-3cH (167)    | 4.7805(1)         | 4.7805(1)        | 13.0561(3)          | 90       | 90      | 120      |
|                                                                   | 160607                         | Al <sub>2</sub> O <sub>3</sub> | R-3cH (167)    | 4.7936(1)         | 4.7936(1)        | 13.0955(3)          | 90       | 90      | 120      |
|                                                                   | 160901                         | Al <sub>2</sub> O <sub>3</sub> | R-3cH (167)    | 4.7598(1)         | 4.7598(1)        | 12.9943(1)          | 90       | 90      | 120      |
|                                                                   | 160902                         | Al <sub>2</sub> O <sub>3</sub> | R-3cH (167)    | 4.761(1)          | 4.761(1)         | 12.997(3)           | 90       | 90      | 120      |
|                                                                   | 160903                         | Al <sub>2</sub> O <sub>3</sub> | R-3cH (167)    | 4.761(1)          | 4.761(1)         | 12.997(3)           | 90       | 90      | 120      |
|                                                                   | 160904                         | Al <sub>2</sub> O <sub>3</sub> | R-3cH (167)    | 4.761(1)          | 4.761(1)         | 12.999(1)           | 90       | 90      | 120      |
|                                                                   | 164617                         | Al <sub>2</sub> O <sub>3</sub> | R-3cH (167)    | 4.7600(1)         | 4.7600(1)        | 12.9943(3)          | 90       | 90      | 120      |
|                                                                   | 165594                         | Al <sub>2</sub> O <sub>3</sub> | R-3cH (167)    | 4.759116<br>2(9)  | 4.759116<br>2(9) | 12.9973116<br>0(12) | 90       | 90      | 120      |
|                                                                   | 197685                         | Al <sub>2</sub> O <sub>3</sub> | R-3cH (167)    | 4.758             | 4.758            | 12.991              | 90       | 90      | 120      |
|                                                                   | 198101                         | Al <sub>2</sub> O <sub>3</sub> | R-3cH (167)    | 4.7576            | 4.7576           | 12.9834             | 90       | 90      | 120      |
|                                                                   | 24005                          | Al <sub>2</sub> O <sub>3</sub> | R-3cR (167)    | 5.12(1)           | 5.12(1)          | 5.12(1)             | 55.28    | 55.28   | 55.28    |
|                                                                   | 24851                          | Al <sub>2</sub> O <sub>3</sub> | R-3cH (167)    | 4.763             | 4.763            | 13                  | 90       | 90      | 120      |
|                                                                   | 25778                          | Al <sub>2</sub> O <sub>3</sub> | R-3cH (167)    | 4.7589(10<br>)    | 4.7589(10<br>)   | 12.991(5)           | 90       | 90      | 120      |
|                                                                   | 26790                          | Al <sub>2</sub> O <sub>3</sub> | R-3cR (167)    | 5.128             | 5.128            | 5.128               | 55.27    | 55.27   | 55.27    |
|                                                                   | 30024                          | Al <sub>2</sub> O <sub>3</sub> | R-3cH (167)    | 4.7657(9)         | 4.7657(9)        | 13.010(14)          | 90       | 90      | 120      |
|                                                                   | 30025                          | Al <sub>2</sub> O <sub>3</sub> | R-3cH (167)    | 4.7517(9)         | 4.7517(9)        | 12.965(17)          | 90       | 90      | 120      |
|                                                                   | 30026                          | Al <sub>2</sub> O <sub>3</sub> | R-3cH (167)    | 4.7418(10<br>)    | 4.7418(10<br>)   | 12.921(20)          | 90       | 90      | 120      |
|                                                                   | 30027                          | Al <sub>2</sub> O <sub>3</sub> | R-3cH (167)    | 4.7351(9)         | 4.7351(9)        | 12.901(17)          | 90       | 90      | 120      |
|                                                                   | 30028                          | Al <sub>2</sub> O <sub>3</sub> | R-3cH (167)    | 4.7242(10<br>)    | 4.7242(10<br>)   | 12.881(18)          | 90       | 90      | 120      |
|                                                                   | 30029                          | Al <sub>2</sub> O <sub>3</sub> | R-3cH (167)    | 4.7212(7)         | 4.7212(7)        | 12.872(14)          | 90       | 90      | 120      |
| 30030                                                             | Al <sub>2</sub> O <sub>3</sub> | R-3cH (167)                    | 4.7145(10<br>) | 4.7145(10<br>)    | 12.851(22)       | 90                  | 90       | 120     |          |
| 31545                                                             | Al <sub>2</sub> O <sub>3</sub> | R-3cH (167)                    | 4.7640(1)      | 4.7640(1)         | 13.0091(3)       | 90                  | 90       | 120     |          |

|        |                                |             |            |            |             |          |          |          |
|--------|--------------------------------|-------------|------------|------------|-------------|----------|----------|----------|
| 31546  | Al <sub>2</sub> O <sub>3</sub> | R-3cH (167) | 4.75860(2) | 4.75860(2) | 12.9906(1)  | 90       | 90       | 120      |
| 31547  | Al <sub>2</sub> O <sub>3</sub> | R-3cH (167) | 4.75860(2) | 4.75860(2) | 12.9906(1)  | 90       | 90       | 120      |
| 31548  | Al <sub>2</sub> O <sub>3</sub> | R-3cH (167) | 4.7640(1)  | 4.7640(1)  | 13.0091(3)  | 90       | 90       | 120      |
| 33639  | Al <sub>2</sub> O <sub>3</sub> | R-3cR (167) | 5.13(2)    | 5.13(2)    | 5.13(2)     | 55.27(8) | 55.27(8) | 55.27(8) |
| 51687  | Al <sub>2</sub> O <sub>3</sub> | R-3cH (167) | 4.7597(1)  | 4.7597(1)  | 12.9935(3)  | 90       | 90       | 120      |
| 52024  | Al <sub>2</sub> O <sub>3</sub> | R-3cH (167) | 4.7570(6)  | 4.757      | 12.9877(35) | 90       | 90       | 120      |
| 52044  | Al <sub>2</sub> O <sub>3</sub> | R-3cH (167) | 4.7570(6)  | 4.757      | 12.9877(35) | 90       | 90       | 120      |
| 52647  | Al <sub>2</sub> O <sub>3</sub> | R-3cH (167) | 4.758      | 4.758      | 12.99       | 90       | 90       | 120      |
| 52648  | Al <sub>2</sub> O <sub>3</sub> | R-3cH (167) | 4.7602(4)  | 4.7602     | 12.9933(17) | 90       | 90       | 120      |
| 56085  | Al <sub>2</sub> O <sub>3</sub> | R-3cR (167) | 5.12(1)    | 5.12(1)    | 5.12(1)     | 55.28    | 55.28    | 55.28    |
| 600672 | Al <sub>2</sub> O <sub>3</sub> | R-3cH (167) | 4.7591(5)  | 4.7591(5)  | 12.9877(13) | 90       | 90       | 120      |
| 60419  | Al <sub>2</sub> O <sub>3</sub> | R-3cH (167) | 4.7606(5)  | 4.7606(5)  | 12.994(1)   | 90       | 90       | 120      |
| 608993 | Al <sub>2</sub> O <sub>3</sub> | R-3cH (167) | 4.803      | 4.803      | 13.13       | 90       | 90       | 120      |
| 608994 | Al <sub>2</sub> O <sub>3</sub> | R-3cH (167) | 4.813      | 4.813      | 13.15       | 90       | 90       | 120      |
| 608995 | Al <sub>2</sub> O <sub>3</sub> | R-3cH (167) | 4.822      | 4.822      | 13.17       | 90       | 90       | 120      |
| 608996 | Al <sub>2</sub> O <sub>3</sub> | R-3cH (167) | 4.832      | 4.832      | 13.18       | 90       | 90       | 120      |
| 608997 | Al <sub>2</sub> O <sub>3</sub> | R-3cH (167) | 4.844      | 4.844      | 13.24       | 90       | 90       | 120      |
| 608998 | Al <sub>2</sub> O <sub>3</sub> | R-3cH (167) | 4.847      | 4.847      | 13.25       | 90       | 90       | 120      |
| 609001 | Al <sub>2</sub> O <sub>3</sub> | R-3cH (167) | 4.7582     | 4.7582     | 12.991      | 90       | 90       | 120      |
| 609004 | Al <sub>2</sub> O <sub>3</sub> | R-3cH (167) | 4.758      | 4.758      | 12.991      | 90       | 90       | 120      |
| 63647  | Al <sub>2</sub> O <sub>3</sub> | R-3cH (167) | 4.7586(1)  | 4.7586(1)  | 12.9897(1)  | 90       | 90       | 120      |
| 63648  | Al <sub>2</sub> O <sub>3</sub> | R-3cH (167) | 4.7586(1)  | 4.7586(1)  | 12.9897(1)  | 90       | 90       | 120      |
| 64713  | Al <sub>2</sub> O <sub>3</sub> | R-3cH (167) | 4.718(6)   | 4.718(6)   | 12.818(14)  | 90       | 90       | 120      |
| 68591  | Al <sub>2</sub> O <sub>3</sub> | R-3cH (167) | 4.76050(5) | 4.76050(5) | 12.9956(2)  | 90       | 90       | 120      |
| 73076  | Al <sub>2</sub> O <sub>3</sub> | R-3cH (167) | 4.76       | 4.76       | 12.993      | 90       | 90       | 120      |
| 73724  | Al <sub>2</sub> O <sub>3</sub> | R-3cH (167) | 4.7540(5)  | 4.7540(5)  | 12.9820(6)  | 90       | 90       | 120      |
| 73725  | Al <sub>2</sub> O <sub>3</sub> | R-3cH (167) | 4.7540(5)  | 4.7540(5)  | 12.9820(6)  | 90       | 90       | 120      |
| 75479  | Al <sub>2</sub> O <sub>3</sub> | R-3cH (167) | 4.7554(3)  | 4.7554(3)  | 12.9910(6)  | 90       | 90       | 120      |
| 75559  | Al <sub>2</sub> O <sub>3</sub> | R-3cH (167) | 4.7589(4)  | 4.7589(4)  | 12.9919(3)  | 90       | 90       | 120      |
| 75560  | Al <sub>2</sub> O <sub>3</sub> | R-3cH (167) | 4.7589(4)  | 4.7589(4)  | 12.9919(3)  | 90       | 90       | 120      |
| 77810  | Al <sub>2</sub> O <sub>3</sub> | R-3cH (167) | 4.7598(1)  | 4.7598     | 12.9924(3)  | 90       | 90       | 120      |
| 85137  | Al <sub>2</sub> O <sub>3</sub> | R-3cH (167) | 4.7607(7)  | 4.7607(7)  | 12.997(2)   | 90       | 90       | 120      |

|                                                      |        |                                                     |                                 |                 |                 |             |    |           |     |
|------------------------------------------------------|--------|-----------------------------------------------------|---------------------------------|-----------------|-----------------|-------------|----|-----------|-----|
|                                                      | 88027  | Al <sub>2</sub> O <sub>3</sub>                      | R-3cH (167)                     | 4.7589(1)       | 4.7589(1)       | 12.991(1)   | 90 | 90        | 120 |
|                                                      | 88028  | Al <sub>2</sub> O <sub>3</sub>                      | R-3cH (167)                     | 4.7585(2)       | 4.7585(2)       | 12.990(1)   | 90 | 90        | 120 |
|                                                      | 88029  | Al <sub>2</sub> O <sub>3</sub>                      | R-3cH (167)                     | 4.7597(1)       | 4.7597(1)       | 12.993(1)   | 90 | 90        | 120 |
|                                                      | 89662  | Al <sub>2</sub> O <sub>3</sub>                      | R-3cH (167)                     | 4.649(6)        | 4.649(6)        | 12.687(8)   | 90 | 90        | 120 |
|                                                      | 89663  | Al <sub>2</sub> O <sub>3</sub>                      | R-3cH (167)                     | 4.641(7)        | 4.641(7)        | 12.666(8)   | 90 | 90        | 120 |
|                                                      | 89664  | Al <sub>2</sub> O <sub>3</sub>                      | R-3cH (167)                     | 4.625(10)       | 4.625(10)       | 12.645(13)  | 90 | 90        | 120 |
|                                                      | 89665  | Al <sub>2</sub> O <sub>3</sub>                      | R-3cH (167)                     | 4.62(3)         | 4.62(3)         | 12.57(5)    | 90 | 90        | 120 |
|                                                      | 92630  | Al <sub>2</sub> O <sub>3</sub>                      | R-3cH (167)                     | 4.7602(4)       | 4.7602(4)       | 12.993(2)   | 90 | 90        | 120 |
|                                                      | 92631  | Al <sub>2</sub> O <sub>3</sub>                      | R-3cH (167)                     | 4.7602(4)       | 4.7602(4)       | 12.993(2)   | 90 | 90        | 120 |
|                                                      | 93096  | Al <sub>2</sub> O <sub>3</sub>                      | R-3cH (167)                     | 4.7599(5)       | 4.7599(5)       | 12.994(2)   | 90 | 90        | 120 |
|                                                      | 9770   | Al <sub>2</sub> O <sub>3</sub>                      | R-3cH (167)                     | 4.7607(9)       | 4.7607(9)       | 12.9947(17) | 90 | 90        | 120 |
|                                                      | 9771   | Al <sub>2</sub> O <sub>3</sub>                      | R-3cH (167)                     | 4.7538(6)       | 4.7538(6)       | 12.9725(5)  | 90 | 90        | 120 |
|                                                      | 9772   | Al <sub>2</sub> O <sub>3</sub>                      | R-3cH (167)                     | 4.7474(4)       | 4.7474(4)       | 12.9542(5)  | 90 | 90        | 120 |
|                                                      | 9773   | Al <sub>2</sub> O <sub>3</sub>                      | R-3cH (167)                     | 4.7437(5)       | 4.7437(5)       | 12.9430(5)  | 90 | 90        | 120 |
|                                                      | 9774   | Al <sub>2</sub> O <sub>3</sub>                      | R-3cH (167)                     | 4.7406(5)       | 4.7406(5)       | 12.9326(16) | 90 | 90        | 120 |
|                                                      | 9775   | Al <sub>2</sub> O <sub>3</sub>                      | R-3cH (167)                     | 4.7352(7)       | 4.7352(7)       | 12.9176(11) | 90 | 90        | 120 |
| Spinel-defect<br>(Al-O)<br>Class_Num_1               | 249140 | Al <sub>2.67</sub> O <sub>4</sub>                   | Fd-<br>3mZ (227)                | 7.93820(1<br>0) | 7.93820(1<br>0) | 7.93820(10) | 90 | 90        | 90  |
|                                                      | 28260  | (Al <sub>2</sub> O <sub>3</sub> ) <sub>5.3333</sub> | Fd-<br>3mS (227)                | 7.906           | 7.906           | 7.906       | 90 | 90        | 90  |
|                                                      | 39014  | (Al <sub>2</sub> O <sub>3</sub> ) <sub>1.333</sub>  | Fd-<br>3mS (227)                | 7.906           | 7.906           | 7.906       | 90 | 90        | 90  |
|                                                      | 39104  | Al <sub>2.66</sub> O <sub>4</sub>                   | Fd-<br>3mS (227)                | 7.906           | 7.906           | 7.906       | 90 | 90        | 90  |
|                                                      | 603780 | Al <sub>2.67</sub> O <sub>4</sub>                   | Fd-<br>3mZ (227)                | 7.947(10)       | 7.947(10)       | 7.947(10)   | 90 | 90        | 90  |
|                                                      | 66558  | Al <sub>2.144</sub> O <sub>3.2</sub>                | Fd-<br>3mZ (227)                | 7.914(2)        | 7.914(2)        | 7.914(2)    | 90 | 90        | 90  |
|                                                      | 66559  | Al <sub>2.144</sub> O <sub>3.2</sub>                | Fd-<br>3mZ (227)                | 7.911(2)        | 7.911(2)        | 7.911(2)    | 90 | 90        | 90  |
|                                                      | 68770  | Al <sub>21.333</sub> O <sub>32</sub>                | Fd-<br>3mS (227)                | 7.9056(4)       | 7.9056(4)       | 7.9056(4)   | 90 | 90        | 90  |
|                                                      | 69213  | Al <sub>2.667</sub> O <sub>4</sub>                  | Fd-<br>3mS (227)                | 7.948(2)        | 7.948(2)        | 7.948(2)    | 90 | 90        | 90  |
| AlFeO <sub>3</sub> (Al-O)<br>Class_Num_2             | 247304 | Al <sub>2</sub> O <sub>3</sub>                      | Pna2 <sub>1</sub> (33)          | 4.8437          | 8.33            | 8.9547      | 90 | 90        | 90  |
|                                                      | 84375  | Al <sub>2</sub> O <sub>3</sub>                      | Pna2 <sub>1</sub> (33)          | 4.8437(2)       | 8.3300(3)       | 8.9547(4)   | 90 | 90        | 90  |
|                                                      | 94485  | Al <sub>2</sub> O <sub>3</sub>                      | Pna2 <sub>1</sub> (33)          | 4.8340(1)       | 8.3096(2)       | 8.9353(2)   | 90 | 90        | 90  |
| Ga <sub>2</sub> O <sub>3</sub> (Al-O)<br>Class_Num_3 | 66560  | Al <sub>2.427</sub> O <sub>3.64</sub>               | C12/m1 (12)                     | 11.854(5)       | 2.904(1)        | 5.622(2)    | 90 | 103.83(7) | 90  |
|                                                      | 82504  | Al <sub>2</sub> O <sub>3</sub>                      | C12/m1 (12)                     | 11.795(5)       | 2.91(1)         | 5.621(7)    | 90 | 103.79    | 90  |
| gamma (Al-O)<br>Class_Num_4                          | 68771  | Al <sub>10.666</sub> O <sub>16</sub>                | I4 <sub>1</sub> /amdS (14<br>1) | 5.600(2)        | 5.600(2)        | 7.854(6)    | 90 | 90        | 90  |
|                                                      | 99836  | (Al <sub>2</sub> O <sub>3</sub> ) <sub>1.333</sub>  | I4 <sub>1</sub> /amdZ (14<br>1) | 5.652(1)        | 5.652(1)        | 7.871(5)    | 90 | 90        | 90  |

|                                                                         |                   |                                                    |                            |            |            |            |    |    |     |
|-------------------------------------------------------------------------|-------------------|----------------------------------------------------|----------------------------|------------|------------|------------|----|----|-----|
| AgSbO <sub>3</sub> (Al-O)<br>Class_Num_5                                | 291495            | Al <sub>2</sub> O <sub>3</sub>                     | Fd-3mZ (227)               | 7.94       | 7.94       | 7.94       | 90 | 90 | 90  |
| Cr <sub>2</sub> Mg <sub>4</sub> O <sub>4</sub> (Al-O)<br>Class_Num_6    | 30267             | (Al <sub>2</sub> O <sub>3</sub> ) <sub>1.333</sub> | Fm-3m (225)                | 3.95       | 3.95       | 3.95       | 90 | 90 | 90  |
| Fluorite-CaF <sub>2</sub> (Al-O)<br>Class_Num_7                         | 28919             | Al <sub>2</sub> O                                  | Fm-3m (225)                | 4.98       | 4.98       | 4.98       | 90 | 90 | 90  |
| NaCl (Al-O)<br>Class_Num_8                                              | 28920             | AlO                                                | Fm-3m (225)                | 5.67       | 5.67       | 5.67       | 90 | 90 | 90  |
| Rh <sub>2</sub> S <sub>3</sub> (Al-O)<br>Class_Num_9                    | 151590            | Al <sub>2</sub> O <sub>3</sub>                     | Pbcn (60)                  | 6.393(1)   | 4.362(1)   | 4.543(1)   | 90 | 90 | 90  |
| No structure type (Al-O)<br>Class_Num_10                                | 23660             | (Al <sub>2</sub> O <sub>3</sub> ) <sub>5.333</sub> | P6 <sub>3</sub> mc (186)   | 5.544(1)   | 5.544(1)   | 9.024(1)   | 90 | 90 | 120 |
| No structure type (Al-O)<br>Class_Num_11                                | 40200             | Al Al <sub>1.67</sub> O <sub>4</sub>               | P-4m2 (115)                | 5.599(10)  | 5.599(10)  | 23.657(50) | 90 | 90 | 90  |
| Fluorite-CaF <sub>2</sub> ,<br>Li <sub>2</sub> O (Li-O)<br>Class_Num_12 | 173180            | Li <sub>2</sub> O                                  | Fm-3m (225)                | 4.614(1)   | 4.614(1)   | 4.614(1)   | 90 | 90 | 90  |
|                                                                         | 173193            | Li <sub>2</sub> O                                  | Fm-3m (225)                | 4.6124(1)  | 4.6124(1)  | 4.6124(1)  | 90 | 90 | 90  |
|                                                                         | 173206            | Li <sub>2</sub> O                                  | Fm-3m (225)                | 4.6128(4)  | 4.6128(4)  | 4.6128(4)  | 90 | 90 | 90  |
|                                                                         | 182024            | Li <sub>2</sub> O                                  | Fm-3m (225)                | 4.728(5)   | 4.728(5)   | 4.728(5)   | 90 | 90 | 90  |
|                                                                         | 182025            | Li <sub>2</sub> O                                  | Fm-3m (225)                | 4.764(5)   | 4.764(5)   | 4.764(5)   | 90 | 90 | 90  |
|                                                                         | 182026            | Li <sub>2</sub> O                                  | Fm-3m (225)                | 4.782(5)   | 4.782(5)   | 4.782(5)   | 90 | 90 | 90  |
|                                                                         | 182027            | Li <sub>2</sub> O                                  | Fm-3m (225)                | 4.807(5)   | 4.807(5)   | 4.807(5)   | 90 | 90 | 90  |
|                                                                         | 182028            | Li <sub>2</sub> O                                  | Fm-3m (225)                | 4.837(5)   | 4.837(5)   | 4.837(5)   | 90 | 90 | 90  |
|                                                                         | 22402             | Li <sub>2</sub> O                                  | Fm-3m (225)                | 4.61       | 4.61       | 4.61       | 90 | 90 | 90  |
|                                                                         | 257372            | Li <sub>2</sub> O                                  | Fm-3m (225)                | 4.61549(5) | 4.61549(5) | 4.61549(5) | 90 | 90 | 90  |
|                                                                         | 54368             | Li <sub>2</sub> O                                  | Fm-3m (225)                | 4.610(5)   | 4.610(5)   | 4.610(5)   | 90 | 90 | 90  |
|                                                                         | 57411             | Li <sub>2</sub> O                                  | Fm-3m (225)                | 4.623      | 4.623      | 4.623      | 90 | 90 | 90  |
|                                                                         | 60431             | Li <sub>2</sub> O                                  | Fm-3m (225)                | 4.628      | 4.628      | 4.628      | 90 | 90 | 90  |
| 642216                                                                  | Li <sub>2</sub> O | Fm-3m (225)                                        | 4.693(5)                   | 4.693(5)   | 4.693(5)   | 90         | 90 | 90 |     |
| Li <sub>2</sub> O <sub>2</sub> (Li-O)<br>Class_Num_13                   | 25530             | Li <sub>2</sub> O <sub>2</sub>                     | P6 <sub>3</sub> /mmc (194) | 3.142      | 3.142      | 7.65       | 90 | 90 | 120 |
| No structure type (Li-O)<br>Class_Num_14                                | 24143             | Li <sub>2</sub> O <sub>2</sub>                     | P-6 (174)                  | 6.305      | 6.305      | 7.71       | 90 | 90 | 120 |
| No structure type (Li-O)<br>Class_Num_15                                | 108886            | Li <sub>2</sub> O                                  | R-3mH (166)                | 3.624      | 3.624      | 7.97       | 90 | 90 | 120 |
|                                                                         | 105548            | SrO                                                | Fm-3m (225)                | 5.160(2)   | 5.16       | 5.16       | 90 | 90 | 90  |



|                                                                      |        |                                                                                                                            |                                       |             |             |             |    |           |     |
|----------------------------------------------------------------------|--------|----------------------------------------------------------------------------------------------------------------------------|---------------------------------------|-------------|-------------|-------------|----|-----------|-----|
| NaCl (Sr-O)<br>Class_Num_16                                          | 109461 | SrO                                                                                                                        | Fm-3m (225)                           | 5.1615(3)   | 5.1615(3)   | 5.1615(3)   | 90 | 90        | 90  |
|                                                                      | 163625 | SrO                                                                                                                        | Fm-3m (225)                           | 5.16132(13) | 5.16132(13) | 5.16132(13) | 90 | 90        | 90  |
|                                                                      | 249178 | SrO                                                                                                                        | Fm-3m (225)                           | 5.1326      | 5.1326      | 5.1326      | 90 | 90        | 90  |
|                                                                      | 26960  | SrO                                                                                                                        | Fm-3m (225)                           | 5.124(10)   | 5.124       | 5.124       | 90 | 90        | 90  |
|                                                                      | 28904  | SrO                                                                                                                        | Fm-3m (225)                           | 5.1396      | 5.1396      | 5.1396      | 90 | 90        | 90  |
|                                                                      | 52276  | SrO                                                                                                                        | Fm-3m (225)                           | 5.154(2)    | 5.154       | 5.154       | 90 | 90        | 90  |
| CaC <sub>2</sub> (Sr-O)<br>Class_Num_17                              | 24249  | SrO <sub>2</sub>                                                                                                           | I4/mmm (139)                          | 3.55        | 3.55        | 6.55        | 90 | 90        | 90  |
|                                                                      | 647474 | SrO <sub>2</sub>                                                                                                           | I4/mmm (139)                          | 3.557       | 3.557       | 6.56        | 90 | 90        | 90  |
|                                                                      | 74967  | SrO <sub>1.95</sub>                                                                                                        | I4/mmm (139)                          | 3.5626(3)   | 3.5626(3)   | 6.6159(6)   | 90 | 90        | 90  |
|                                                                      | 88749  | SrO <sub>1.978</sub>                                                                                                       | I4/mmm (139)                          | 3.5630(2)   | 3.5630(2)   | 6.616(1)    | 90 | 90        | 90  |
|                                                                      | 88750  | SrO <sub>1.962</sub>                                                                                                       | I4/mmm (139)                          | 3.5619(3)   | 3.5619(3)   | 6.576(1)    | 90 | 90        | 90  |
|                                                                      | 88751  | SrO <sub>1.9</sub>                                                                                                         | I4/mmm (139)                          | 3.5585(4)   | 3.5585(4)   | 6.563(1)    | 90 | 90        | 90  |
| LiAlO <sub>2</sub> -gamma<br>(Li-Al-O)<br>Class_Num_18               | 23815  | LiAlO <sub>2</sub>                                                                                                         | P4 <sub>1</sub> 2 <sub>1</sub> 2 (92) | 5.1687(5)   | 5.1687(5)   | 6.2679(6)   | 90 | 90        | 90  |
|                                                                      | 30249  | AlLiO <sub>2</sub>                                                                                                         | P4 <sub>1</sub> 2 <sub>1</sub> 2 (92) | 5.17        | 5.17        | 6.295       | 90 | 90        | 90  |
|                                                                      | 430184 | LiAlO <sub>2</sub>                                                                                                         | P4 <sub>1</sub> 2 <sub>1</sub> 2 (92) | 5.1685(4)   | 5.1685(4)   | 6.2565(8)   | 90 | 90        | 90  |
|                                                                      | 430185 | LiAlO <sub>2</sub>                                                                                                         | P4 <sub>1</sub> 2 <sub>1</sub> 2 (92) | 5.250(10)   | 5.250(10)   | 6.340(10)   | 90 | 90        | 90  |
|                                                                      | 430357 | LiAlO <sub>2</sub>                                                                                                         | P4 <sub>1</sub> 2 <sub>1</sub> 2 (92) | 5.15885(17) | 5.15885(17) | 6.2700(3)   | 90 | 90        | 90  |
|                                                                      | 430358 | LiAlO <sub>2</sub>                                                                                                         | P4 <sub>1</sub> 2 <sub>1</sub> 2 (92) | 5.1965(2)   | 5.1965(2)   | 6.3464(3)   | 90 | 90        | 90  |
|                                                                      | 430359 | LiAlO <sub>2</sub>                                                                                                         | P4 <sub>1</sub> 2 <sub>1</sub> 2 (92) | 5.2252(2)   | 5.2252(2)   | 6.4038(3)   | 90 | 90        | 90  |
| Li <sub>5</sub> AlO <sub>4</sub> (Li-Al-O)<br>Class_Num_19           | 1037   | Li <sub>5</sub> AlO <sub>4</sub>                                                                                           | PmmnZ (59)                            | 6.42        | 6.302       | 4.62        | 90 | 90        | 90  |
|                                                                      | 16229  | Li <sub>5</sub> AlO <sub>4</sub>                                                                                           | PmmnZ (59)                            | 6.424(3)    | 6.305(3)    | 4.623(2)    | 90 | 90        | 90  |
| spinel-LiFe <sub>5</sub> O <sub>8</sub><br>(Li-Al-O)<br>Class_Num_20 | 10480  | LiAl <sub>5</sub> O <sub>8</sub>                                                                                           | P4 <sub>3</sub> 32 (212)              | 7.908(2)    | 7.908(2)    | 7.908(2)    | 90 | 90        | 90  |
|                                                                      | 83016  | LiAl <sub>5</sub> O <sub>8</sub>                                                                                           | P4 <sub>3</sub> 32 (212)              | 7.903(5)    | 7.903(5)    | 7.903(5)    | 90 | 90        | 90  |
| Spinel-defect<br>(Li-Al-O)<br>Class_Num_21                           | 83017  | (Li <sub>0.25</sub> Al <sub>0.75</sub> ) <sub>2</sub> (Li <sub>0.75</sub> Al <sub>1.25</sub> ) <sub>2</sub> O <sub>7</sub> | Fd-3mS (227)                          | 7.910(5)    | 7.910(5)    | 7.910(5)    | 90 | 90        | 90  |
| Delafossite-<br>NaCrS <sub>2</sub> (Li-Al-O)<br>Class_Num_22         | 28288  | LiAlO <sub>2</sub>                                                                                                         | R-3mH (166)                           | 2.8003(6)   | 2.8003(6)   | 14.216(3)   | 90 | 90        | 120 |
| LiFeO <sub>2</sub> -alpha<br>(Li-Al-O)<br>Class_Num_23               | 99517  | LiAlO <sub>2</sub>                                                                                                         | I4 <sub>1</sub> /amdZ (141)           | 3.8866(8)   | 3.8866(8)   | 8.3001(13)  | 90 | 90        | 90  |
| Li <sub>5</sub> GaO <sub>4</sub> -alpha<br>(Li-Al-O)<br>Class_Num_24 | 42697  | Li <sub>5</sub> AlO <sub>4</sub>                                                                                           | Pbca (61)                             | 9.087(3)    | 8.947(3)    | 9.120(3)    | 90 | 90        | 90  |
| SrAl <sub>2</sub> O <sub>4</sub> (Sr-Al-O)<br>Class_Num_25           | 160296 | Sr(Al <sub>2</sub> O <sub>4</sub> )                                                                                        | P12 <sub>1</sub> 1 (4)                | 8.44365(9)  | 8.82245(8)  | 5.15964(6)  | 90 | 93.411(1) | 90  |
|                                                                      | 160297 | Sr(Al <sub>2</sub> O <sub>4</sub> )                                                                                        | P12 <sub>1</sub> 1 (4)                | 8.5066(5)   | 8.8898(5)   | 5.1732(3)   | 90 | 92.875(4) | 90  |

|                                                                              |        |                                                                                    |                            |              |            |             |    |            |     |
|------------------------------------------------------------------------------|--------|------------------------------------------------------------------------------------|----------------------------|--------------|------------|-------------|----|------------|-----|
|                                                                              | 26466  | SrAl <sub>2</sub> O <sub>4</sub>                                                   | P12 <sub>1</sub> (4)       | 8.447        | 8.816      | 5.163       | 90 | 93.42      | 90  |
|                                                                              | 291357 | SrAl <sub>2</sub> O <sub>4</sub>                                                   | P12 <sub>1</sub> (4)       | 8.43904(1)   | 8.81425(2) | 5.156355(9) | 90 | 93.4094(1) | 90  |
|                                                                              | 291361 | SrAl <sub>2</sub> O <sub>4</sub>                                                   | P12 <sub>1</sub> (4)       | 8.41634(8)   | 8.78882(8) | 5.1565(5)   | 90 | 93.5079(9) | 90  |
| M-type-ferrite#CaAl <sub>12</sub> O <sub>19</sub> (Sr-Al-O)<br>Class_Num_26  | 184967 | Sr(Al <sub>12</sub> O <sub>19</sub> )                                              | P6 <sub>3</sub> /mmc (194) | 5.564        | 5.564      | 22.002      | 90 | 90         | 120 |
|                                                                              | 2006   | SrO(Al <sub>2</sub> O <sub>3</sub> ) <sub>6</sub>                                  | P6 <sub>3</sub> /mmc (194) | 5.562(2)     | 5.562(2)   | 21.9719(50) | 90 | 90         | 120 |
|                                                                              | 239757 | Al <sub>12</sub> SrO <sub>19</sub>                                                 | P6 <sub>3</sub> /mmc (194) | 5.57661      | 5.57661    | 22.143(1)   | 90 | 90         | 120 |
|                                                                              | 69020  | SrAl <sub>12</sub> O <sub>19</sub>                                                 | P6 <sub>3</sub> /mmc (194) | 5.5666(2)    | 5.5666(2)  | 22.0018(8)  | 90 | 90         | 120 |
| Sr <sub>4</sub> Al <sub>14</sub> O <sub>25</sub> (Sr-Al-O)<br>Class_Num_27   | 258392 | Sr <sub>4</sub> Al <sub>14</sub> O <sub>25</sub>                                   | Pmma (51)                  | 24.7703(84)  | 8.4797(31) | 4.8833(17)  | 90 | 90         | 90  |
|                                                                              | 27744  | Sr <sub>4</sub> Al <sub>4</sub> O <sub>2</sub> (Al <sub>10</sub> O <sub>23</sub> ) | Pmma (51)                  | 24.785(1)    | 8.487(2)   | 4.886(1)    | 90 | 90         | 90  |
|                                                                              | 88527  | (SrO) <sub>4</sub> (Al <sub>2</sub> O <sub>3</sub> ) <sub>7</sub>                  | Pmma (51)                  | 24.74509(20) | 8.4735(6)  | 4.8808(1)   | 90 | 90         | 90  |
| BaMgSiO <sub>4</sub> (Sr-Al-O)<br>Class_Num_28                               | 153164 | Sr(Al <sub>2</sub> O <sub>4</sub> )                                                | P6 <sub>3</sub> (173)      | 8.9260(3)    | 8.9260(3)  | 8.4985(2)   | 90 | 90         | 120 |
|                                                                              | 160298 | Sr(Al <sub>2</sub> O <sub>4</sub> )                                                | P6 <sub>3</sub> (173)      | 8.9291(1)    | 8.9291(1)  | 8.4963(4)   | 90 | 90         | 120 |
|                                                                              | 160299 | Sr(Al <sub>2</sub> O <sub>4</sub> )                                                | P6 <sub>3</sub> (173)      | 8.9349(1)    | 8.9349(1)  | 8.5109(3)   | 90 | 90         | 120 |
| BaAl <sub>2</sub> O <sub>4</sub> (Sr-Al-O)<br>Class_Num_29                   | 160300 | Sr(Al <sub>2</sub> O <sub>4</sub> )                                                | P6 <sub>3</sub> 22 (182)   | 5.1666(1)    | 5.1666(1)  | 8.5485(3)   | 90 | 90         | 120 |
|                                                                              | 160301 | Sr(Al <sub>2</sub> O <sub>5</sub> )                                                | P6 <sub>3</sub> 22 (182)   | 5.1765(1)    | 5.1765(1)  | 8.5758(1)   | 90 | 90         | 120 |
| Ca <sub>9</sub> Al <sub>6</sub> O <sub>18</sub> (Sr-Al-O)<br>Class_Num_30    | 66062  | Sr <sub>9</sub> (Al <sub>6</sub> O <sub>18</sub> )                                 | Pa-3 (205)                 | 15.8476(2)   | 15.8476(2) | 15.8476(2)  | 90 | 90         | 90  |
|                                                                              | 71860  | Sr <sub>3</sub> Al <sub>2</sub> O <sub>6</sub>                                     | Pa-3 (205)                 | 15.8556(4)   | 15.8556(4) | 15.8556(4)  | 90 | 90         | 90  |
| CaAl <sub>4</sub> O <sub>7</sub> (Sr-Al-O)<br>Class_Num_31                   | 16751  | (SrO)(Al <sub>2</sub> O <sub>3</sub> ) <sub>2</sub>                                | C12/c1 (15)                | 13.04        | 9.01       | 5.55        | 90 | 106.502    | 90  |
|                                                                              | 2817   | SrAl <sub>4</sub> O <sub>7</sub>                                                   | C12/c1 (15)                | 13.0389(90)  | 9.0113(45) | 5.5358(27)  | 90 | 106.7      | 90  |
| No structure type (Sr-Al-O)<br>Class_Num_32                                  | 200671 | Sr <sub>7</sub> Al <sub>12</sub> O <sub>25</sub>                                   | P3 (143)                   | 17.91        | 17.91      | 7.16        | 90 | 90         | 120 |
|                                                                              | 57177  | Sr <sub>7</sub> Al <sub>12</sub> O <sub>25</sub>                                   | P-3 (147)                  | 17.91        | 17.91      | 7.16        | 90 | 90         | 120 |
| CaAlB <sub>3</sub> O <sub>7</sub> (Sr-Al-O)<br>Class_Num_33                  | 34803  | Sr(Al <sub>4</sub> O <sub>7</sub> )                                                | Cmma (67)                  | 8.085(5)     | 11.845(8)  | 4.407(3)    | 90 | 90         | 90  |
| Sr <sub>0.5</sub> Al <sub>11</sub> O <sub>17</sub> (Sr-Al-O)<br>Class_Num_34 | 108851 | Sr <sub>0.5</sub> Al <sub>11</sub> O <sub>17</sub>                                 | R-3mH (166)                | 5.622        | 5.622      | 33.5        | 90 | 90         | 120 |
| Sr <sub>10</sub> Ga <sub>6</sub> O <sub>19</sub> (Sr-Al-O)<br>Class_Num_35   | 95535  | Sr <sub>10</sub> Al <sub>6</sub> O <sub>19</sub>                                   | C12/c1 (15)                | 34.5823(21)  | 7.8460(6)  | 15.7485(9)  | 90 | 103.68(1)  | 90  |
| No structure type (Sr-Al-O)<br>Class_Num_36                                  | 97713  | Sr <sub>2</sub> (Al <sub>6</sub> O <sub>11</sub> )                                 | Pnmm (58)                  | 21.9145(8)   | 4.8843(2)  | 8.4039(3)   | 90 | 90         | 90  |
| No structure type (Sr-Li-Al-O)<br>Class_Num_37                               | -      | Sr <sub>2</sub> LiAlO <sub>4</sub>                                                 | P12 <sub>1</sub> /m1 (11)  | 5.81998      | 5.63362    | 6.65907     | 90 | 106.483    | 90  |

**Supplementary Table 4** A comparison between the height fraction and the weight fraction, which was correctly measured using real experimental XRD pattern data for SrAl<sub>2</sub>O<sub>4</sub>-SrO-Al<sub>2</sub>O<sub>3</sub> and Li<sub>2</sub>O-SrO-Al<sub>2</sub>O<sub>3</sub> mixture systems.

| Compositional space                                  | Sample No. | Weight fraction   |        |                                | Mol. fraction     |        |                                | Height fraction   |        |                                |
|------------------------------------------------------|------------|-------------------|--------|--------------------------------|-------------------|--------|--------------------------------|-------------------|--------|--------------------------------|
|                                                      |            | Li <sub>2</sub> O | SrO    | Al <sub>2</sub> O <sub>3</sub> | Li <sub>2</sub> O | SrO    | Al <sub>2</sub> O <sub>3</sub> | Li <sub>2</sub> O | SrO    | Al <sub>2</sub> O <sub>3</sub> |
| Li <sub>2</sub> O-SrO-Al <sub>2</sub> O <sub>3</sub> | 0          | 17.80%            | 12.30% | 69.90%                         | 42.55%            | 8.48%  | 48.97%                         | 13.76%            | 27.72% | 58.52%                         |
|                                                      | 1          | 31.72%            | 23.98% | 44.29%                         | 61.46%            | 13.40% | 25.15%                         | 39.73%            | 44.01% | 16.27%                         |
|                                                      | 2          | 20.61%            | 38.55% | 40.84%                         | 47.17%            | 25.44% | 27.39%                         | 29.46%            | 59.49% | 11.05%                         |
|                                                      | 3          | 12.07%            | 13.32% | 74.62%                         | 31.95%            | 10.17% | 57.88%                         | 26.93%            | 30.42% | 42.64%                         |
|                                                      | 4          | 23.62%            | 31.10% | 45.28%                         | 51.51%            | 19.56% | 28.94%                         | 30.24%            | 54.52% | 15.24%                         |
|                                                      | 5          | 12.68%            | 30.44% | 56.88%                         | 33.26%            | 23.02% | 43.72%                         | 10.57%            | 63.47% | 25.96%                         |
|                                                      | 6          | 25.82%            | 29.23% | 44.95%                         | 54.45%            | 17.77% | 27.78%                         | 25.93%            | 56.73% | 17.34%                         |
|                                                      | 7          | 12.50%            | 17.47% | 70.02%                         | 32.85%            | 13.24% | 53.92%                         | 14.72%            | 46.77% | 38.51%                         |
|                                                      | 8          | 13.50%            | 8.17%  | 78.33%                         | 34.78%            | 6.07%  | 59.15%                         | 16.69%            | 31.71% | 51.60%                         |
|                                                      | 9          | 16.68%            | 9.06%  | 74.26%                         | 40.63%            | 6.36%  | 53.01%                         | 19.71%            | 31.34% | 48.95%                         |
|                                                      | 10         | 32.03%            | 5.33%  | 62.64%                         | 61.69%            | 2.96%  | 35.35%                         | 48.19%            | 16.85% | 34.96%                         |
|                                                      | 11         | 9.99%             | 8.91%  | 81.10%                         | 27.50%            | 7.07%  | 65.43%                         | 12.97%            | 29.43% | 57.59%                         |
|                                                      | 12         | 7.67%             | 20.02% | 72.32%                         | 22.14%            | 16.67% | 61.19%                         | 16.97%            | 49.05% | 33.98%                         |
|                                                      | 13         | 13.11%            | 21.87% | 65.02%                         | 34.08%            | 16.39% | 49.53%                         | 13.22%            | 52.65% | 34.13%                         |
|                                                      | 14         | 23.02%            | 25.16% | 51.82%                         | 50.64%            | 15.96% | 33.40%                         | 23.23%            | 53.23% | 23.54%                         |
|                                                      | 15         | 21.80%            | 24.82% | 53.38%                         | 48.88%            | 16.05% | 35.07%                         | 24.80%            | 51.67% | 23.53%                         |
|                                                      | 16         | 15.44%            | 23.40% | 61.17%                         | 38.49%            | 16.82% | 44.69%                         | 11.94%            | 59.16% | 28.89%                         |
|                                                      | 17         | 22.22%            | 16.40% | 61.39%                         | 49.44%            | 10.52% | 40.03%                         | 9.69%             | 59.11% | 31.20%                         |
|                                                      | 18         | 14.53%            | 22.87% | 62.60%                         | 36.81%            | 16.71% | 46.48%                         | 22.40%            | 32.37% | 45.23%                         |
|                                                      | 19         | 15.87%            | 23.45% | 60.68%                         | 39.27%            | 16.73% | 44.00%                         | 22.13%            | 54.68% | 23.19%                         |
|                                                      | 20         | 21.98%            | 11.51% | 66.50%                         | 49.08%            | 7.41%  | 43.51%                         | 16.21%            | 50.42% | 33.38%                         |
|                                                      | 21         | 22.64%            | 17.82% | 59.54%                         | 50.06%            | 11.36% | 38.58%                         | 24.20%            | 31.14% | 44.66%                         |
|                                                      | 22         | 25.45%            | 8.19%  | 66.35%                         | 53.86%            | 5.00%  | 41.15%                         | 17.15%            | 44.78% | 38.07%                         |
|                                                      | 23         | 39.25%            | 32.13% | 28.63%                         | 68.97%            | 16.28% | 14.74%                         | 21.07%            | 66.55% | 12.38%                         |
|                                                      | 24         | 13.74%            | 14.97% | 71.29%                         | 35.28%            | 11.08% | 53.64%                         | 14.95%            | 44.61% | 40.44%                         |
|                                                      | 25         | 29.67%            | 28.52% | 41.82%                         | 59.16%            | 16.40% | 24.44%                         | 25.36%            | 57.52% | 17.11%                         |
|                                                      | 26         | 19.02%            | 9.44%  | 71.54%                         | 44.54%            | 6.37%  | 49.09%                         | 29.83%            | 27.67% | 42.50%                         |
|                                                      | 27         | 37.53%            | 19.07% | 43.40%                         | 67.32%            | 9.86%  | 22.81%                         | 38.11%            | 39.02% | 22.87%                         |
|                                                      | 28         | 9.91%             | 3.95%  | 86.14%                         | 27.31%            | 3.14%  | 69.56%                         | 29.86%            | 13.96% | 56.18%                         |
|                                                      | 29         | 14.58%            | 5.46%  | 79.96%                         | 36.83%            | 3.98%  | 59.19%                         | 25.23%            | 16.98% | 57.79%                         |
| 30                                                   | 14.88%     | 2.90%             | 82.22% | 37.38%                         | 2.10%             | 60.52% | 25.68%                         | 12.69%            | 61.63% |                                |

|                                                                      |            |                                  |        |                                |                                  |        |                                |                                  |        |                                |
|----------------------------------------------------------------------|------------|----------------------------------|--------|--------------------------------|----------------------------------|--------|--------------------------------|----------------------------------|--------|--------------------------------|
|                                                                      | 31         | 9.07%                            | 16.88% | 74.04%                         | 25.45%                           | 13.66% | 60.89%                         | 9.92%                            | 48.55% | 41.53%                         |
|                                                                      | 32         | 19.15%                           | 3.55%  | 77.30%                         | 44.71%                           | 2.39%  | 52.89%                         | 21.58%                           | 15.52% | 62.89%                         |
|                                                                      | 33         | 28.14%                           | 21.71% | 50.15%                         | 57.32%                           | 12.75% | 29.93%                         | 39.69%                           | 39.82% | 20.49%                         |
|                                                                      | 34         | 17.02%                           | 5.31%  | 77.67%                         | 41.20%                           | 3.71%  | 55.10%                         | 27.60%                           | 16.42% | 55.98%                         |
|                                                                      | 35         | 14.79%                           | 14.83% | 70.39%                         | 37.26%                           | 10.77% | 51.97%                         | 15.57%                           | 42.77% | 41.66%                         |
|                                                                      | 36         | 16.94%                           | 4.78%  | 78.28%                         | 41.06%                           | 3.34%  | 55.60%                         | 29.32%                           | 15.92% | 54.76%                         |
|                                                                      | 37         | 32.69%                           | 40.49% | 26.82%                         | 62.59%                           | 22.36% | 15.05%                         | 29.90%                           | 60.87% | 9.24%                          |
|                                                                      | 38         | 22.18%                           | 33.31% | 44.51%                         | 49.48%                           | 21.43% | 29.10%                         | 15.34%                           | 66.18% | 18.48%                         |
|                                                                      | 39         | 34.99%                           | 18.18% | 46.83%                         | 64.85%                           | 9.72%  | 25.44%                         | 30.50%                           | 45.90% | 23.60%                         |
|                                                                      | 40         | 13.35%                           | 16.35% | 70.29%                         | 34.53%                           | 12.19% | 53.28%                         | 10.70%                           | 45.91% | 43.39%                         |
|                                                                      | 41         | 28.36%                           | 7.55%  | 64.09%                         | 57.50%                           | 4.41%  | 38.08%                         | 45.15%                           | 20.00% | 34.85%                         |
|                                                                      | 42         | 18.84%                           | 9.64%  | 71.52%                         | 44.25%                           | 6.53%  | 49.22%                         | 23.30%                           | 28.67% | 48.03%                         |
|                                                                      | 43         | 13.74%                           | 28.89% | 57.38%                         | 35.33%                           | 21.42% | 43.24%                         | 9.05%                            | 64.75% | 26.20%                         |
|                                                                      | 44         | 15.27%                           | 8.36%  | 76.37%                         | 38.12%                           | 6.02%  | 55.87%                         | 18.22%                           | 27.92% | 53.86%                         |
|                                                                      | 45         | 15.81%                           | 16.91% | 67.28%                         | 39.13%                           | 12.07% | 48.80%                         | 31.32%                           | 26.64% | 42.04%                         |
|                                                                      | 46         | 14.45%                           | 27.68% | 57.87%                         | 36.68%                           | 20.26% | 43.05%                         | 18.22%                           | 56.83% | 24.95%                         |
|                                                                      | 47         | 18.47%                           | 16.38% | 65.16%                         | 43.68%                           | 11.17% | 45.15%                         | 21.44%                           | 42.33% | 36.23%                         |
|                                                                      | 48         | 34.11%                           | 27.37% | 38.53%                         | 64.00%                           | 14.81% | 21.19%                         | 31.19%                           | 52.67% | 16.15%                         |
|                                                                      | 49         | 6.32%                            | 15.86% | 77.83%                         | 18.75%                           | 13.57% | 67.68%                         | 8.77%                            | 46.12% | 45.11%                         |
| Compositional space                                                  | Sample No. | Weight fraction                  |        |                                | Mol. fraction                    |        |                                | Height fraction                  |        |                                |
|                                                                      |            | SrAl <sub>2</sub> O <sub>4</sub> | SrO    | Al <sub>2</sub> O <sub>3</sub> | SrAl <sub>2</sub> O <sub>4</sub> | SrO    | Al <sub>2</sub> O <sub>3</sub> | SrAl <sub>2</sub> O <sub>4</sub> | SrO    | Al <sub>2</sub> O <sub>3</sub> |
| SrAl <sub>2</sub> O <sub>4</sub> -SrO-Al <sub>2</sub> O <sub>3</sub> | 0          | 62.02%                           | 6.09%  | 31.88%                         | 44.82%                           | 8.73%  | 46.45%                         | 32.04%                           | 28.17% | 39.79%                         |
|                                                                      | 1          | 33.74%                           | 6.76%  | 59.49%                         | 20.19%                           | 8.03%  | 71.78%                         | 22.60%                           | 23.28% | 54.11%                         |
|                                                                      | 2          | 61.79%                           | 10.88% | 27.33%                         | 44.62%                           | 15.59% | 39.79%                         | 26.74%                           | 37.90% | 35.35%                         |
|                                                                      | 3          | 61.18%                           | 11.52% | 27.30%                         | 43.99%                           | 16.43% | 39.58%                         | 26.21%                           | 38.68% | 35.11%                         |
|                                                                      | 4          | 73.45%                           | 2.63%  | 23.92%                         | 57.88%                           | 4.11%  | 38.01%                         | 20.96%                           | 55.57% | 23.46%                         |
|                                                                      | 5          | 68.41%                           | 10.78% | 20.82%                         | 51.91%                           | 16.23% | 31.86%                         | 30.01%                           | 36.13% | 33.86%                         |
|                                                                      | 6          | 56.04%                           | 16.67% | 27.29%                         | 38.88%                           | 22.95% | 38.17%                         | 23.92%                           | 45.14% | 30.94%                         |
|                                                                      | 7          | 21.29%                           | 12.52% | 66.19%                         | 11.85%                           | 13.83% | 74.31%                         | 11.55%                           | 39.89% | 48.56%                         |
|                                                                      | 8          | 22.73%                           | 12.79% | 64.48%                         | 12.76%                           | 14.25% | 72.99%                         | 12.77%                           | 37.93% | 49.30%                         |
|                                                                      | 9          | 57.98%                           | 7.89%  | 34.13%                         | 40.70%                           | 10.99% | 48.31%                         | 31.21%                           | 28.20% | 40.59%                         |
|                                                                      | 10         | 85.77%                           | 3.93%  | 10.30%                         | 75.02%                           | 6.82%  | 18.16%                         | 40.51%                           | 23.54% | 35.94%                         |
|                                                                      | 11         | 31.92%                           | 6.78%  | 61.29%                         | 18.89%                           | 7.96%  | 73.14%                         | 19.98%                           | 24.44% | 55.59%                         |
|                                                                      | 12         | 56.51%                           | 12.44% | 31.05%                         | 39.30%                           | 17.16% | 43.54%                         | 27.54%                           | 38.40% | 34.06%                         |
|                                                                      | 13         | 58.33%                           | 13.17% | 28.50%                         | 41.10%                           | 18.41% | 40.49%                         | 24.61%                           | 41.12% | 34.27%                         |
|                                                                      | 14         | 81.75%                           | 8.68%  | 9.57%                          | 69.12%                           | 14.56% | 16.32%                         | 35.92%                           | 32.64% | 31.43%                         |

|    |        |        |        |        |        |        |        |        |        |
|----|--------|--------|--------|--------|--------|--------|--------|--------|--------|
| 15 | 82.84% | 5.52%  | 11.64% | 70.65% | 9.34%  | 20.01% | 37.98% | 26.38% | 35.64% |
| 16 | 68.13% | 8.52%  | 23.35% | 51.57% | 12.79% | 35.64% | 28.50% | 38.56% | 32.94% |
| 17 | 55.45% | 9.48%  | 35.07% | 38.25% | 12.97% | 48.78% | 27.87% | 32.77% | 39.37% |
| 18 | 39.18% | 14.78% | 46.04% | 24.29% | 18.18% | 57.54% | 18.04% | 45.23% | 36.73% |
| 19 | 22.47% | 18.96% | 58.57% | 12.61% | 21.11% | 66.28% | 10.45% | 48.01% | 41.54% |
| 20 | 38.35% | 14.62% | 47.03% | 23.65% | 17.88% | 58.47% | 18.19% | 42.14% | 39.68% |
| 21 | 39.08% | 40.70% | 20.22% | 24.33% | 50.28% | 25.39% | 12.20% | 71.71% | 16.08% |
| 22 | 58.08% | 1.95%  | 39.96% | 40.75% | 2.71%  | 56.53% | 31.21% | 20.66% | 48.12% |
| 23 | 71.86% | 12.02% | 16.12% | 56.05% | 18.60% | 25.35% | 29.86% | 38.48% | 31.67% |
| 24 | 59.91% | 5.00%  | 35.08% | 42.62% | 7.06%  | 50.32% | 29.27% | 28.67% | 42.06% |
| 25 | 79.23% | 8.91%  | 11.86% | 65.58% | 14.63% | 19.79% | 34.90% | 33.58% | 31.51% |
| 26 | 47.90% | 14.82% | 37.27% | 31.42% | 19.29% | 49.29% | 22.74% | 40.81% | 36.45% |
| 27 | 61.07% | 9.28%  | 29.64% | 43.86% | 13.22% | 42.92% | 30.61% | 32.75% | 36.64% |
| 28 | 63.14% | 3.06%  | 33.80% | 45.97% | 4.42%  | 49.61% | 31.83% | 23.64% | 44.54% |
| 29 | 62.37% | 16.42% | 21.20% | 45.30% | 23.66% | 31.04% | 24.31% | 48.27% | 27.41% |
| 30 | 48.76% | 13.78% | 37.46% | 32.16% | 18.03% | 49.81% | 20.87% | 43.42% | 35.71% |
| 31 | 77.46% | 2.86%  | 19.68% | 63.07% | 4.62%  | 32.31% | 41.68% | 20.15% | 38.18% |
| 32 | 43.59% | 23.29% | 33.12% | 27.84% | 29.51% | 42.65% | 17.97% | 52.90% | 29.13% |
| 33 | 65.46% | 10.00% | 24.53% | 48.58% | 14.72% | 36.70% | 28.04% | 39.84% | 32.12% |
| 34 | 51.83% | 30.87% | 17.29% | 35.04% | 41.40% | 23.57% | 15.03% | 65.60% | 19.37% |
| 35 | 39.85% | 8.41%  | 51.74% | 24.77% | 10.37% | 64.85% | 21.11% | 31.90% | 46.99% |
| 36 | 54.55% | 12.30% | 33.15% | 37.42% | 16.74% | 45.85% | 26.75% | 36.81% | 36.44% |
| 37 | 36.16% | 43.58% | 20.26% | 22.12% | 52.89% | 24.99% | 9.94%  | 75.68% | 14.38% |
| 38 | 69.54% | 4.60%  | 25.86% | 53.16% | 6.98%  | 39.86% | 35.70% | 22.08% | 42.22% |
| 39 | 54.12% | 14.49% | 31.39% | 37.03% | 19.67% | 43.30% | 23.94% | 44.02% | 32.04% |
| 40 | 45.94% | 14.73% | 39.34% | 29.74% | 18.92% | 51.35% | 20.20% | 42.83% | 36.97% |
| 41 | 30.55% | 16.30% | 53.15% | 17.96% | 19.02% | 63.02% | 14.73% | 47.40% | 37.87% |
| 42 | 64.78% | 7.95%  | 27.27% | 47.80% | 11.64% | 40.57% | 30.48% | 32.09% | 37.43% |
| 43 | 67.49% | 8.79%  | 23.72% | 50.84% | 13.14% | 36.03% | 31.43% | 31.54% | 37.03% |
| 44 | 70.57% | 5.65%  | 23.77% | 54.41% | 8.64%  | 36.95% | 34.56% | 26.79% | 38.66% |
| 45 | 55.34% | 7.00%  | 37.66% | 38.12% | 9.57%  | 52.31% | 28.37% | 28.74% | 42.89% |
| 46 | 33.75% | 18.17% | 48.08% | 20.24% | 21.62% | 58.14% | 14.93% | 49.13% | 35.95% |
| 47 | 84.15% | 10.62% | 5.23%  | 72.69% | 18.20% | 9.11%  | 36.91% | 33.72% | 29.37% |
| 48 | 74.99% | 12.62% | 12.39% | 59.99% | 20.03% | 19.98% | 31.22% | 39.25% | 29.53% |
| 49 | 57.08% | 28.77% | 14.15% | 40.00% | 40.00% | 19.99% | 30.81% | 42.26% | 26.92% |
