# Supplementary material for: A deep-learning technique for phase identification in multiphase inorganic compounds using synthetic XRD powder patterns
Source: PubMed Central journal article supplement (PMC6941984; doi:10.1038/s41467-019-13749-3), 2020-01-03
Supplement: 41467_2019_13749_MOESM2_ESM.pdf [file 41467_2019_13749_MOESM2_ESM.pdf]

## **Description of Additional Supplementary Files**

File name: Supplementary Data 1

Description: Weight dataset 1. Fully trained weights and biases for Simple phase identification code

File name: Supplementary Data 2

Description: Weight dataset 2. Fully trained weights and biases for 3\_Level\_Fraction\_Prediction code
